# Supplementary material
Source: PubMed Central journal article supplement (PMC8165468)
Supplement: Supp_FigS1.pdf [file Supp_FigS1.pdf]

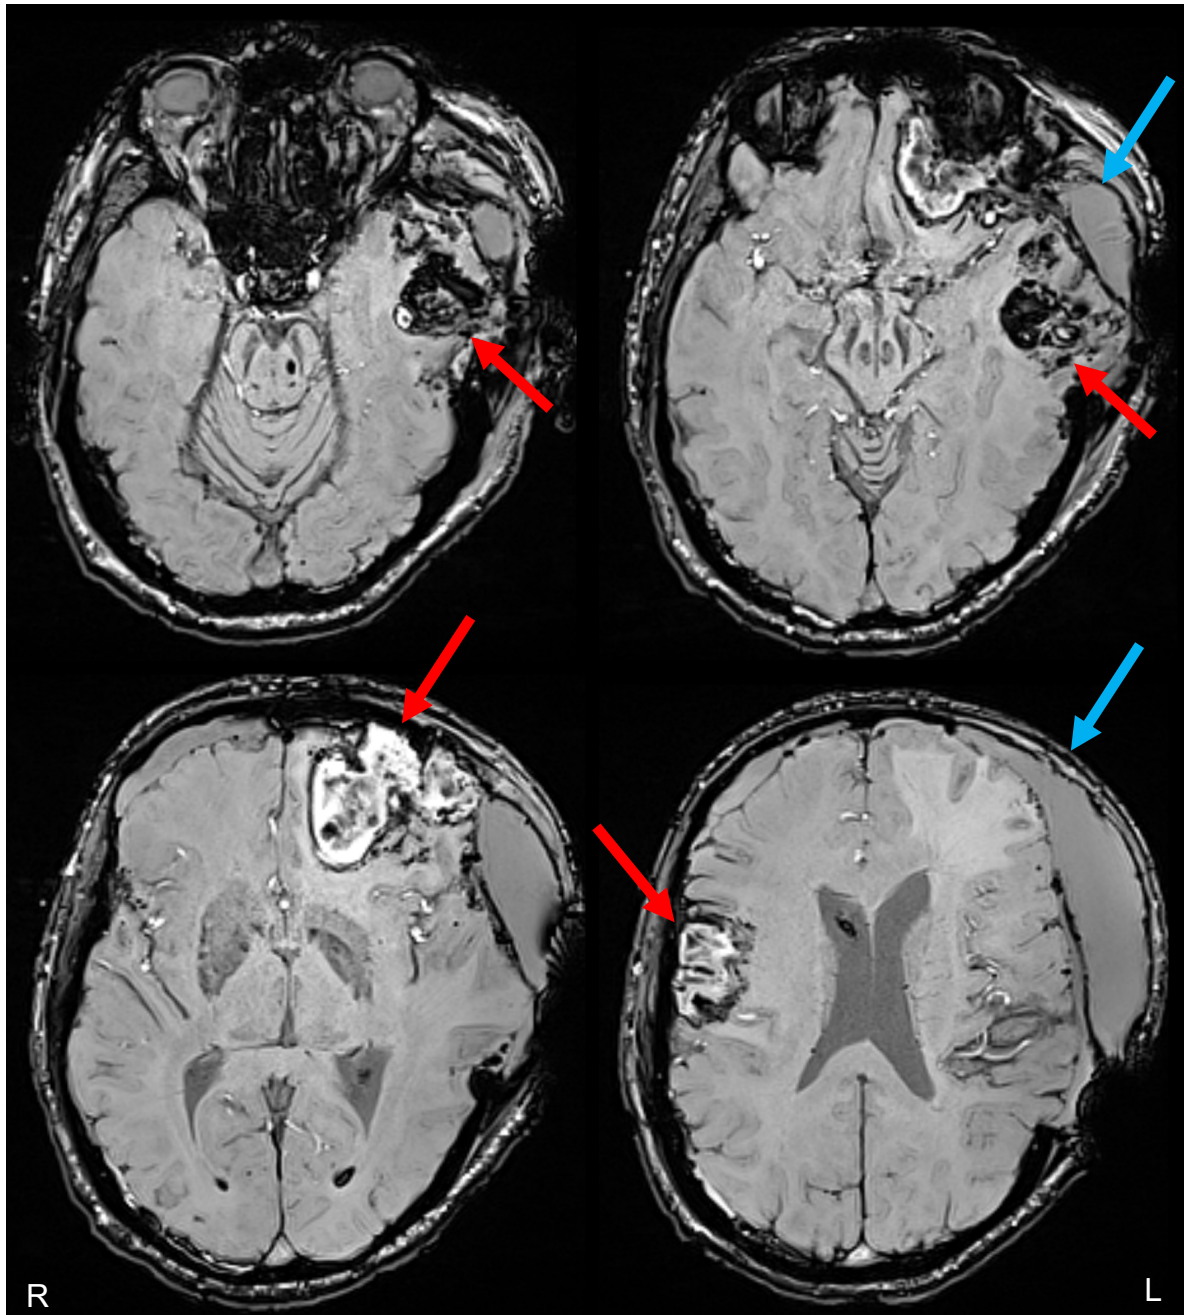

**Supplemental Figure 1. Susceptibility-weighted *in vivo* MRI performed on day 13 post-injury.** Axial images are shown at the level of the caudal midbrain (top left), rostral midbrain (top right), mid-thalamus (bottom left), and septum pellucidum (bottom right). Multifocal contusions are indicated by red arrows in the left frontal lobe, left temporal lobe, and right frontal lobe. An extra-axial fluid collection is also seen in the left frontotemporal region (blue arrows), at the site of the recent left hemicraniectomy. In the top right image, the medial temporal lobes are seen compressing the dorsal aspect of the rostral midbrain bilaterally. R = right, L = left.
