# Supplementary material
Source: PubMed Central journal article supplement (PMC8165468)
Supplement: Supp_FigS2.pdf [file Supp_FigS2.pdf]

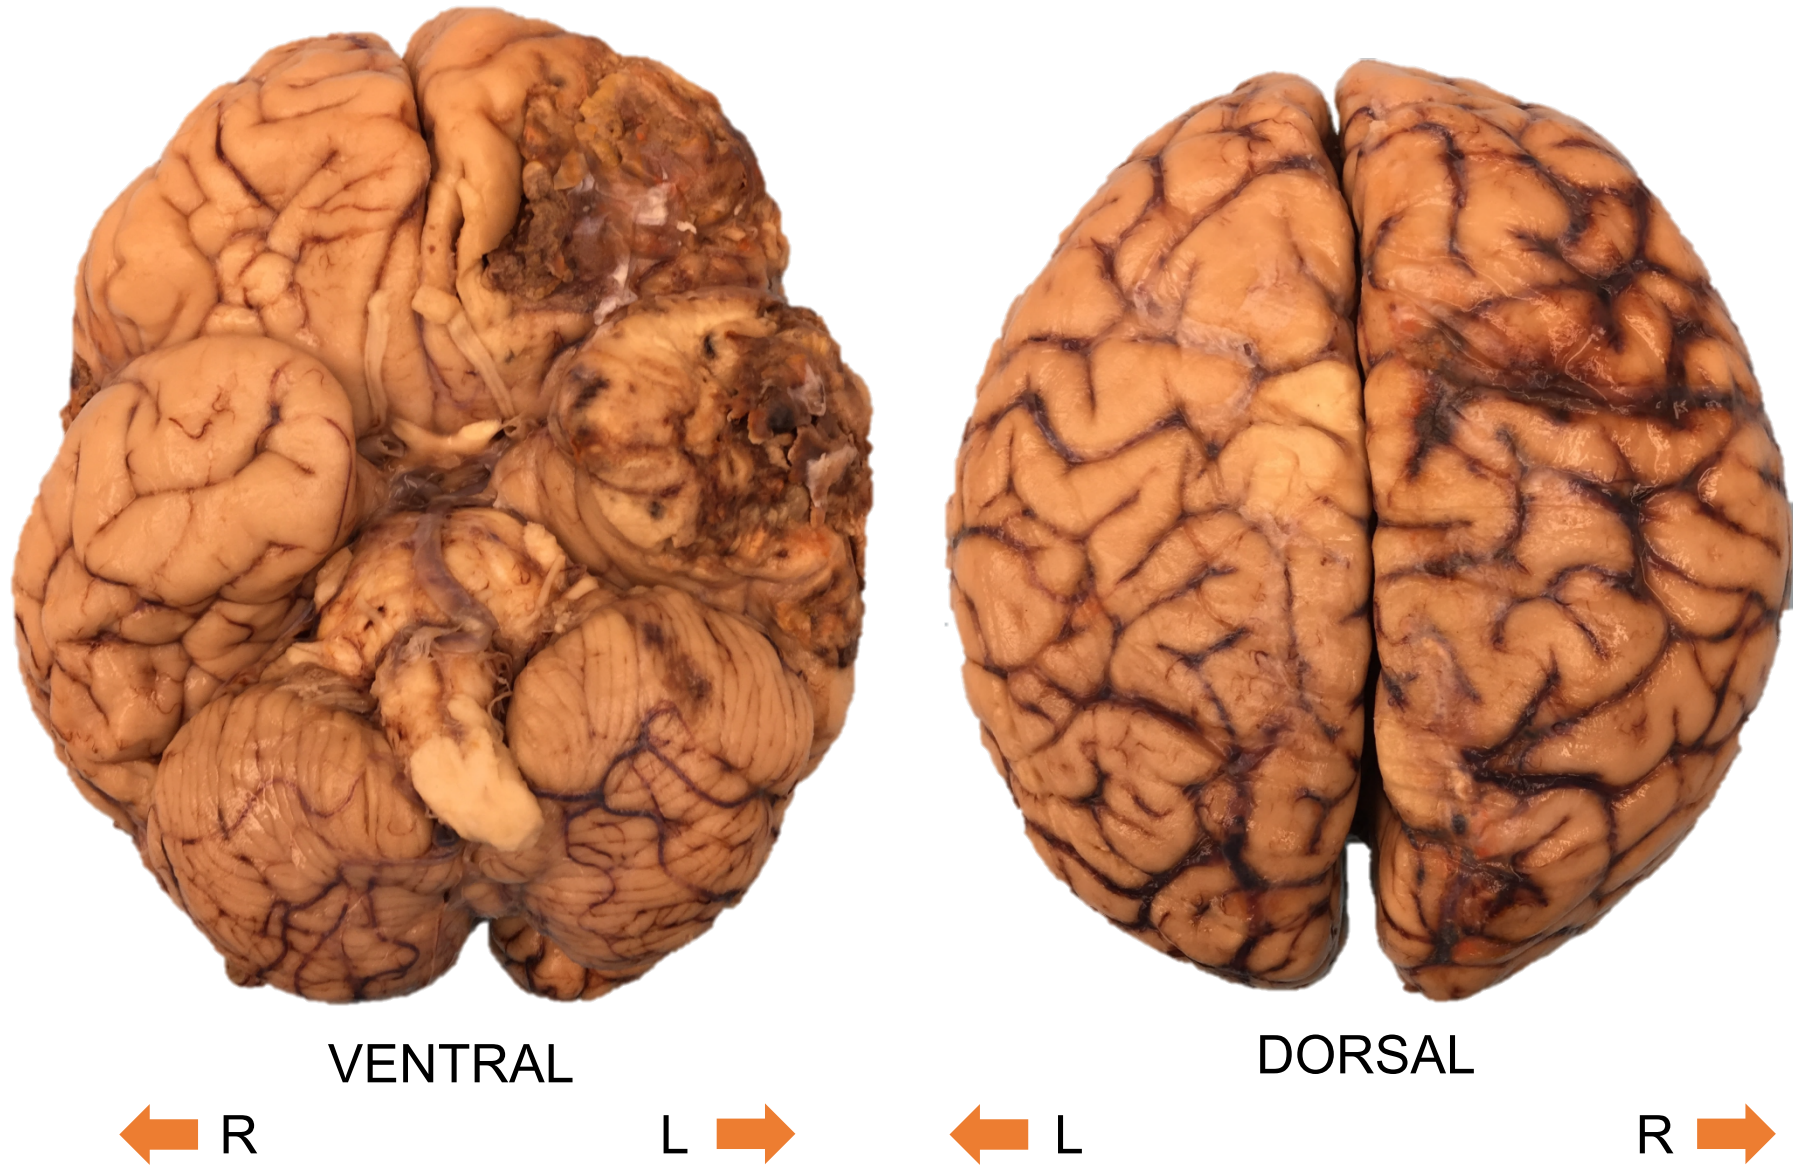

**Supplemental Figure 2. Gross Exterior Pathology of the Human Brain Specimen.**

The specimen is shown from a ventral perspective (left) and dorsal perspective (right). Left frontotemporal contusions are seen on the ventral surface of the brain, and sulcal subarachnoid hemorrhage is seen on the right side of the dorsal surface of the brain.
