# Supplementary material
Source: PubMed Central journal article supplement (PMC8165468)
Supplement: Supp_FigS4.pdf [file Supp_FigS4.pdf]

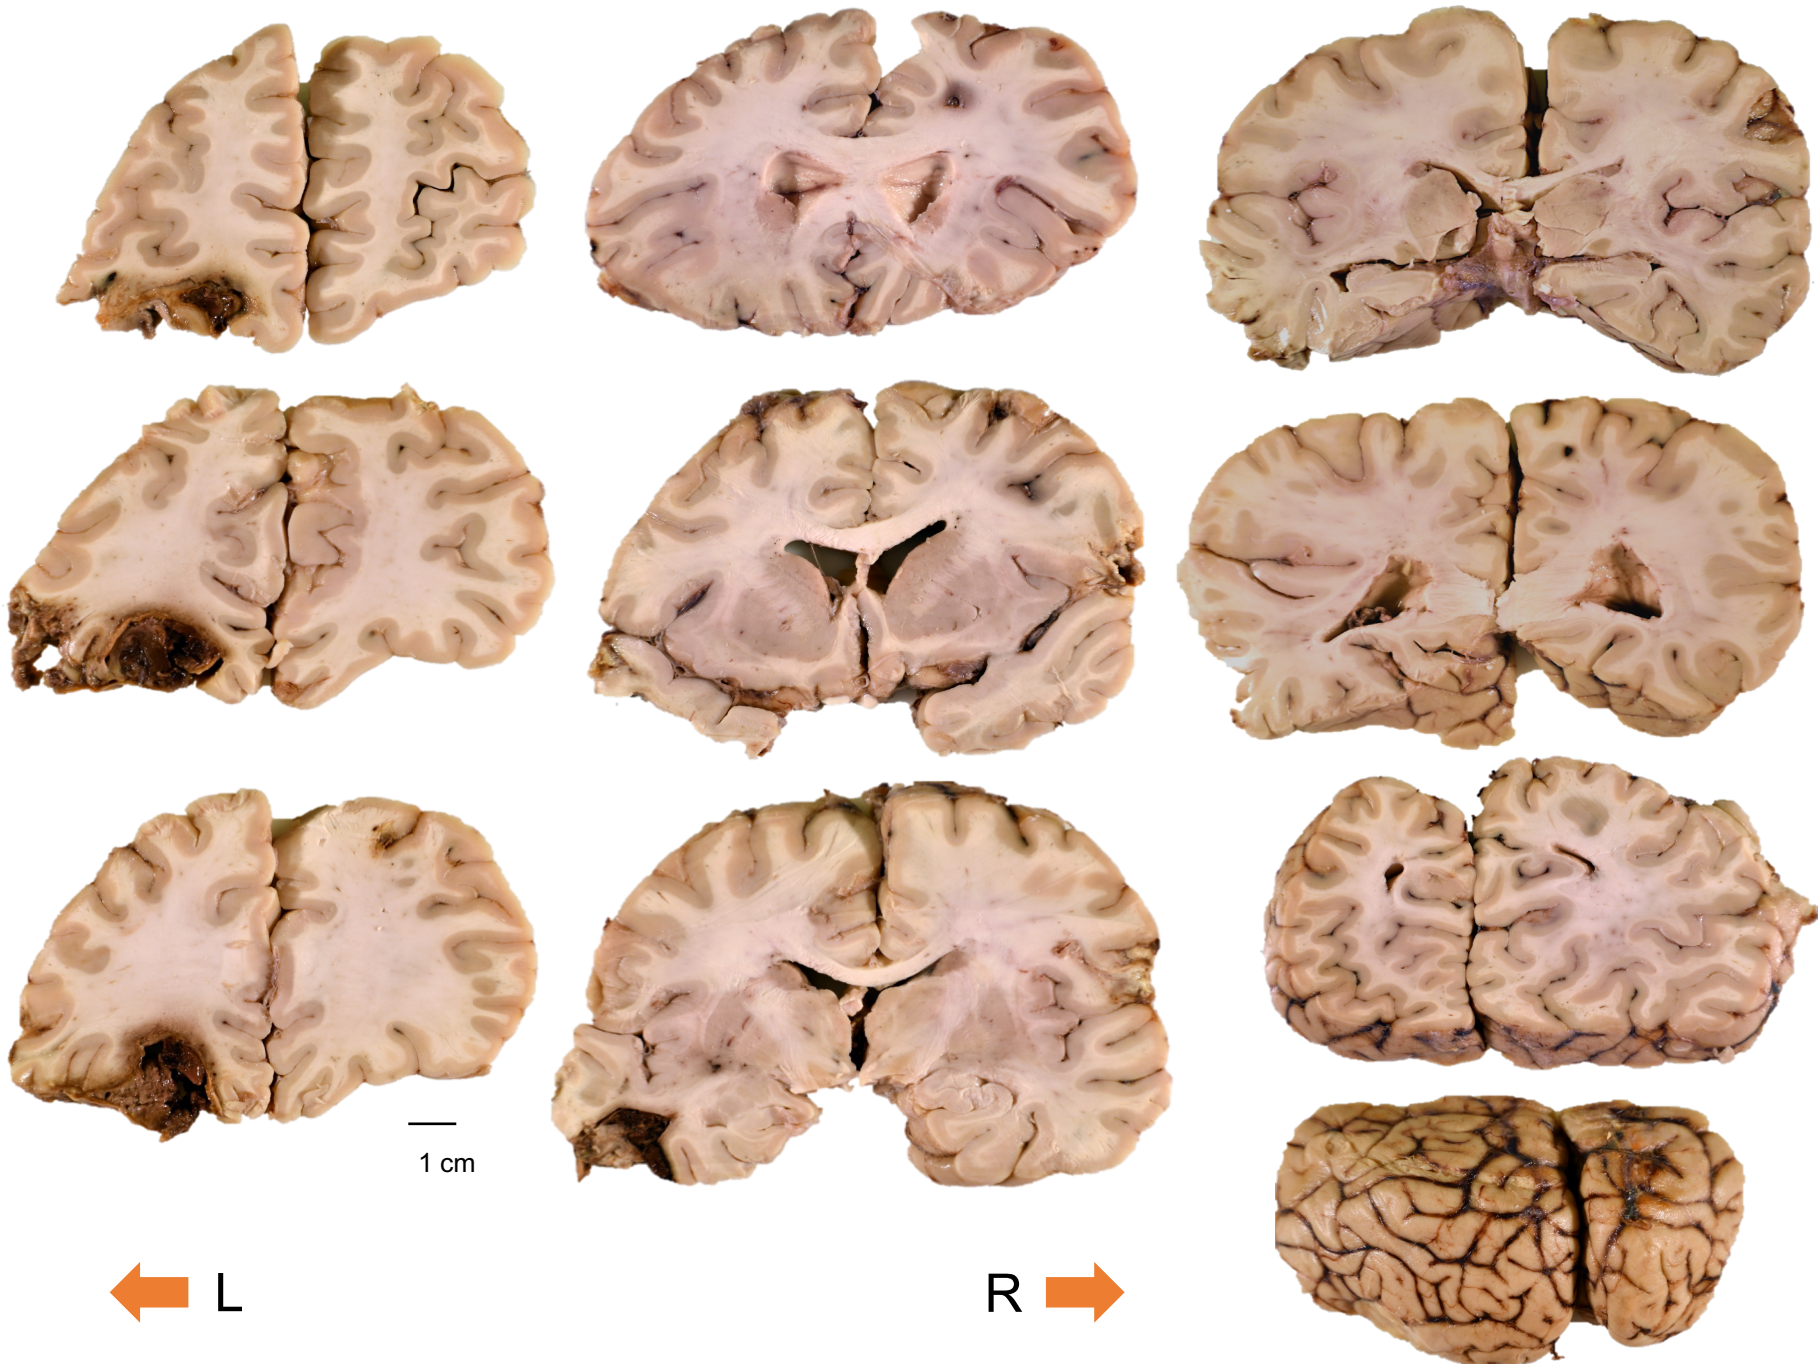

**Supplemental Figure 4. Coronal Slabs of the Cerebral Hemispheres.**  
The slabs are displayed from anterior (top left slab) to posterior (bottom right slab).
