# Supplementary material
Source: PubMed Central journal article supplement (PMC8165468)
Supplement: Supp_FigS5.pdf [file Supp_FigS5.pdf]

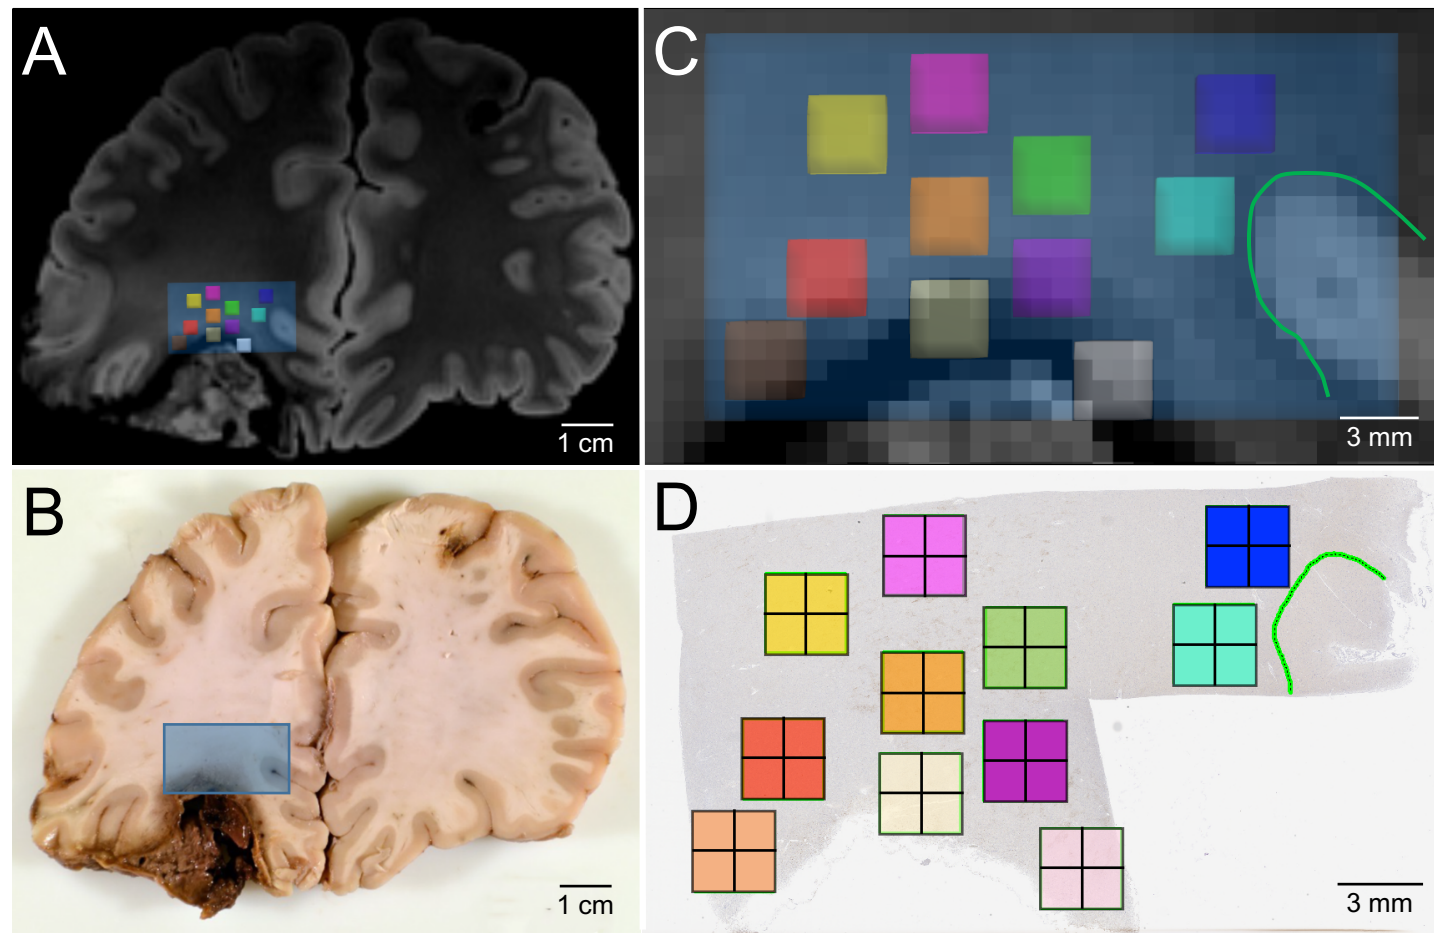

**Supplemental Figure 5. Coregistration of pericontusional regions for analysis in *ex vivo* imaging and histologic sections.**

A) Coronal section of MRI at the level of the left inferior frontal contusion. Blue box indicates area sampled for histology. B) Gross pathology of the same region. Blue box indicates the tissue block taken for histology. C) Magnification of area taken for histologic sampling from A. Small yellow, red, pink, orange, green, purple, turquoise, dark blue, brown, cream and light pink boxes indicate regions of analysis for tractography, which were co-registered to the histology by mapping their anatomic relationship to the grey-white junction. The green outline in (C) indicates the grey-white junction at the depth of the cortical sulcus. D) Image of tissue section with matching color-coded boxes, indicating regions of analysis for histology. A green outline of the grey-white junction is shown in (D) to match the green outline shown in (C).
