# Supplementary material
Source: PubMed Central journal article supplement (PMC8165468)
Supplement: Supp_FigS7.pdf [file Supp_FigS7.pdf]

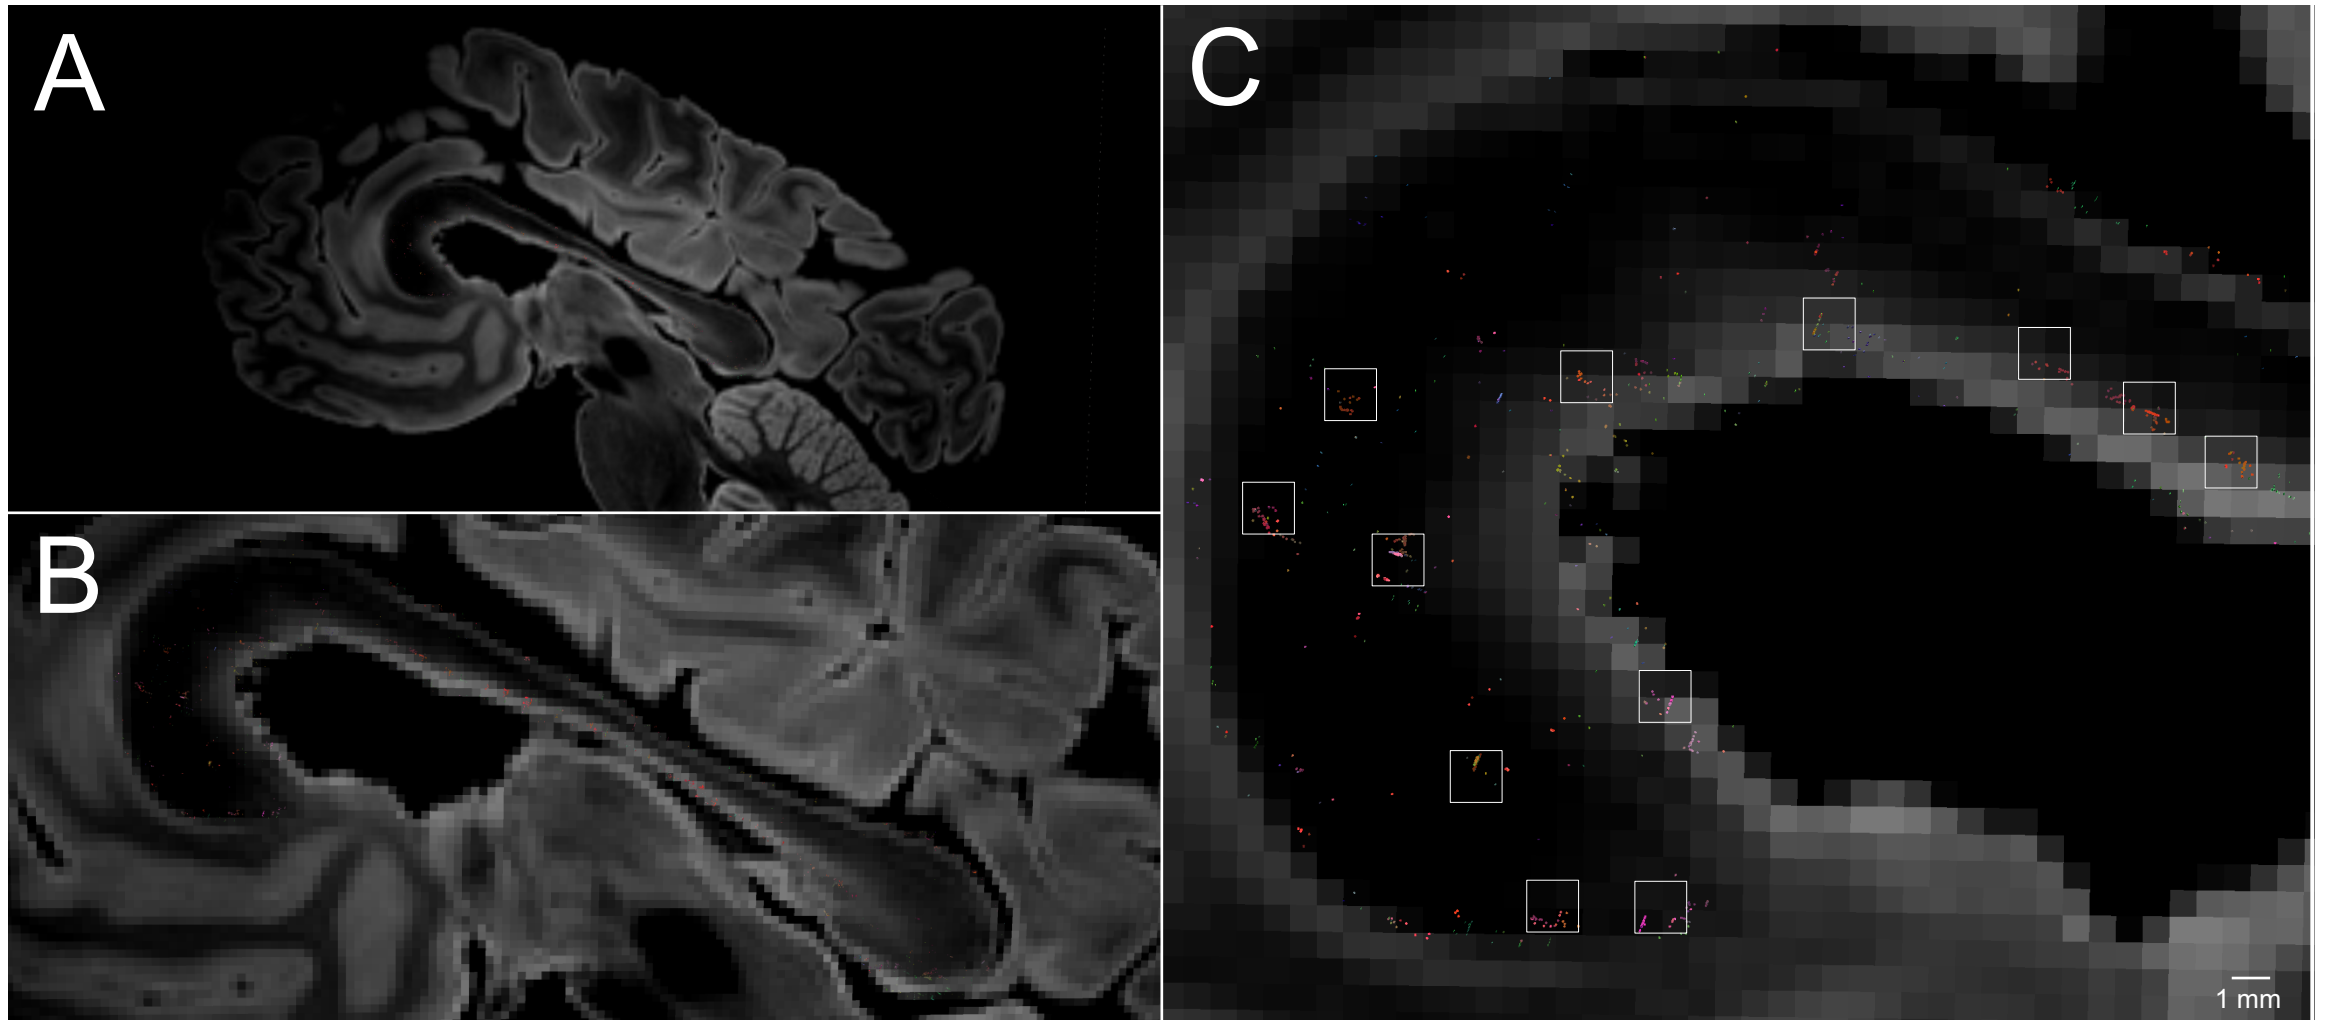

**Supplemental Figure 7. Cluster Analysis of Callosal Tract Disconnections.**

A sagittal diffusion-weighted image (DWI) is shown at the midline from a left lateral perspective in (A). A zoomed view is shown in (B), with endpoints shown for fiber tracts that are disconnected as they pass through a corpus callosum region of interest. Tract endpoints are color-coded by direction (red = medial-lateral; green = antero-posterior; blue = superior-inferior). A high-zoom view is shown in (C). Clusters of disconnected tract end-points are seen in the genu and anterior body of the corpus callosum, located within 2 x 2 voxel (1.5 x 1.5 mm) regions (white squares), indicating that tract endpoints tend to form small clusters rather than being evenly distributed throughout a white matter bundle.
