# Supplementary material
Source: PubMed Central journal article supplement (PMC8165468)
Supplement: Supp_FigS8.pdf [file Supp_FigS8.pdf]

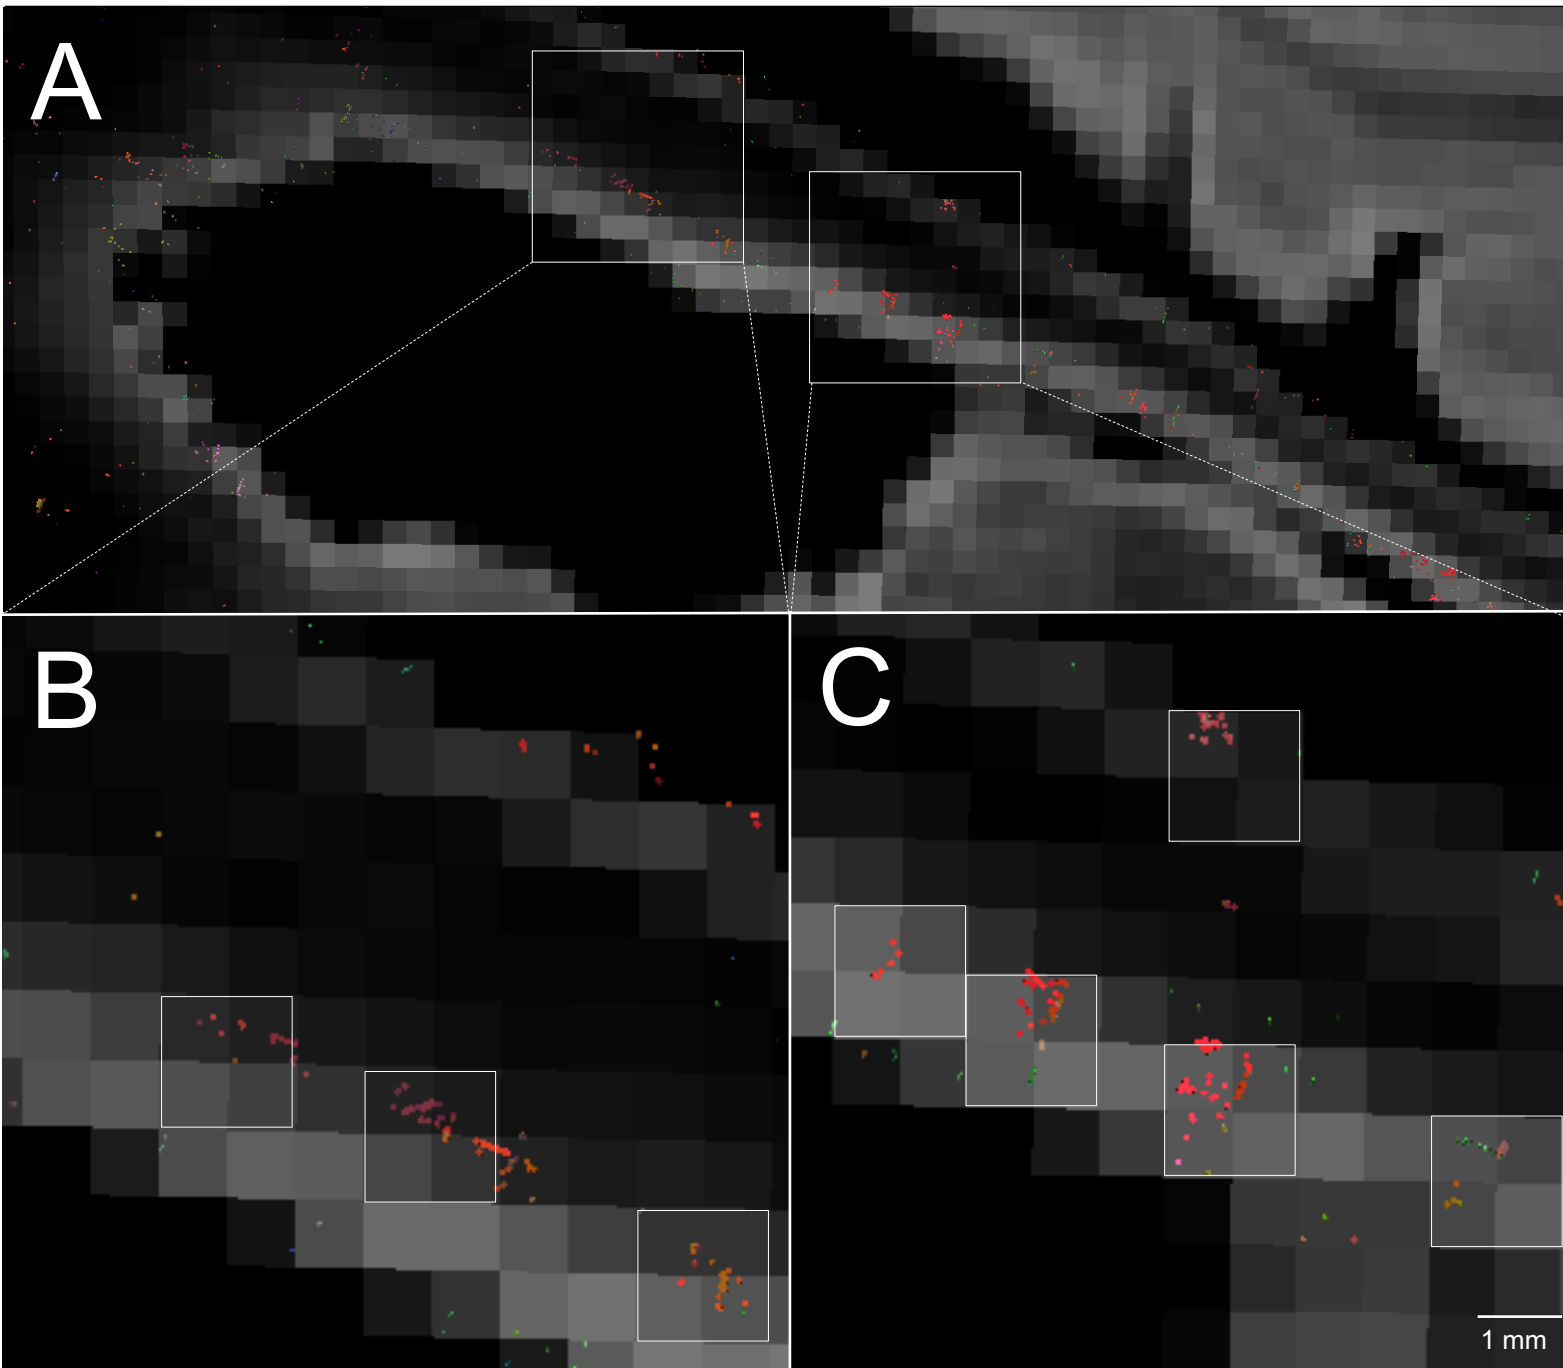

### Supplemental Figure 8. Cluster Analysis of Disconnected Callosal Tracts.

As in Supplementary Figure 8, a sagittal diffusion-weighted image (DWI) is shown at the midline from a left lateral perspective in (A). Zoomed views of the two regions indicated by white boxes are shown in (B and C), with endpoints shown for fiber tracts that are disconnected as they pass through a corpus callosum region of interest. Tract endpoints are color-coded by direction (red = medial-lateral; green = antero-posterior; blue = superior-inferior). In (B) and (C), clusters of disconnected tract end-points are again seen within 2 x 2 voxel (1.5 x 1.5 mm) regions (white squares) in the mid-body of the corpus callosum, indicating that tract endpoints tend to form small clusters rather than being evenly distributed throughout a white matter bundle.
