# Supplementary material
Source: PubMed Central journal article supplement (PMC8165468)
Supplement: Supp_FigS9.pdf [file Supp_FigS9.pdf]

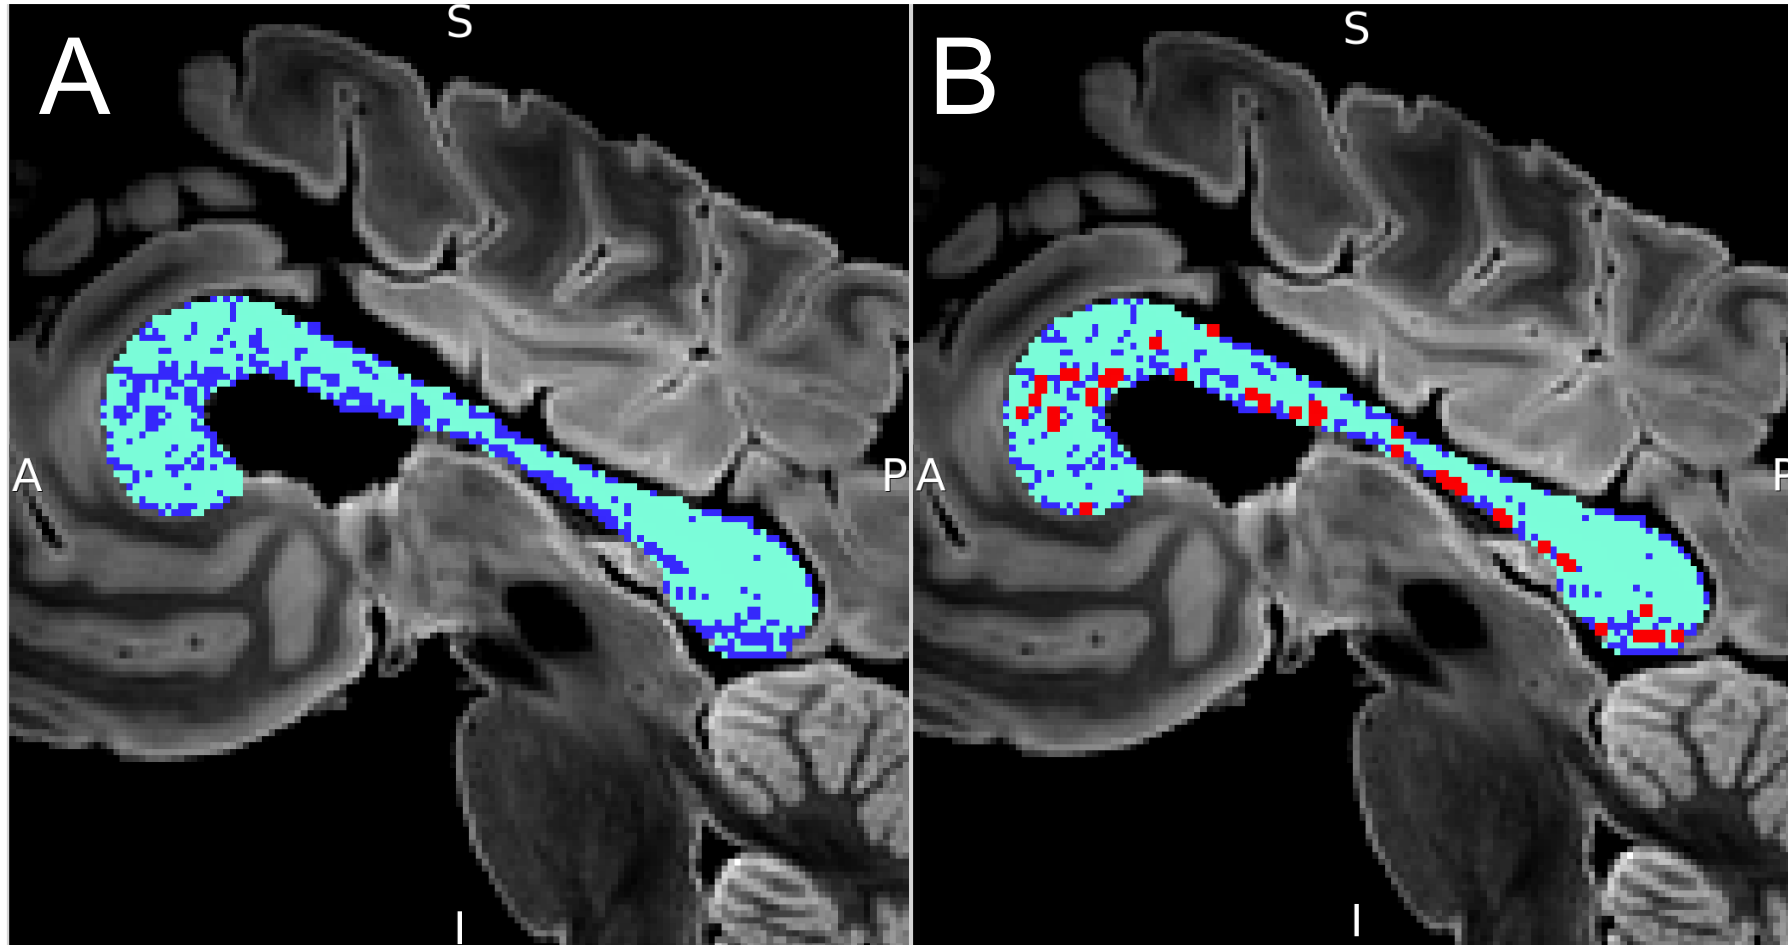

**Supplemental Figure 9. Quantitative Cluster Analysis of Disconnected Tracts in the Corpus Callosum.** The splenium of the corpus callosum is labeled in turquoise and shown from a sagittal perspective at the midline. (A) Voxels that contain  $\geq 1$  disconnected tract are labeled in dark blue. (B) Disconnected tracts located in 2x2-voxel, square-shaped clusters are labeled in red. These 2x2-voxel square-shaped clusters accounted for 32.9% (144/438) of all voxels with disconnected tracts within the turquoise region of interest.
