# Supplementary material
Source: PubMed Central journal article supplement (PMC8165468)
Supplement: Supp_TableS1.pdf [file Supp_TableS1.pdf]

| CDE                                 | Present? | Laterality | Anatomic Site                                                                                                    | Comments                                                                                          |
|-------------------------------------|----------|------------|------------------------------------------------------------------------------------------------------------------|---------------------------------------------------------------------------------------------------|
| Skull fracture                      | Y        | Right      | Parietal                                                                                                         | Also with skull defect due to left hemicraniectomy                                                |
| Epidural hemorrhage                 | N        | N/A        | N/A                                                                                                              | N/A                                                                                               |
| Subdural hemorrhage                 | Y        | Bilateral  | Fronto-temporo-parietal                                                                                          | N/A                                                                                               |
| Subarachnoid hemorrhage             | Y        | Right      | Sylvian fissure and frontoparietal sulci                                                                         | Sylvian fissure subarachnoid hemorrhage is adjacent to small right fronto-temporal contusions     |
| Contusion                           | Y        | Bilateral  | Bifrontal, bitemporal                                                                                            | Left frontal and left temporal contusions larger than right frontal and right temporal contusions |
| Traumatic Axonal Injury             | Y        | bilateral  | Hemispheric white matter, as well as genu of the corpus callosum, bilateral midbrain tegmentum, and ventral pons | N/A                                                                                               |
| Edema                               | Y        | Left       | Pericontusional edema within the left frontal and left temporal contusions                                       | N/A                                                                                               |
| Ischemic or hypoxic-ischemic injury | N        | N/A        | N/A                                                                                                              | N/A                                                                                               |
| Brain atrophy or encephalomalacia   | N        | N/A        | N/A                                                                                                              | N/A                                                                                               |

**Supplemental Table 1: Traumatic Lesions Visualized on *In Vivo* MRI.**

All pathoanatomic lesions are characterized using the NIH Common Data Element (CDE) Guidelines for Traumatic Brain Injury Neuroimaging. N/A = not applicable.
