# Supplementary material
Source: PubMed Central journal article supplement (PMC8165468)
Supplement: Supp_TableS2.pdf [file Supp_TableS2.pdf]

| <b>CDE</b>                          | <b>Present?</b>  | <b>Laterality</b> | <b>Anatomic Site</b>                                                                                             | <b>Comments</b>                                                                                   |
|-------------------------------------|------------------|-------------------|------------------------------------------------------------------------------------------------------------------|---------------------------------------------------------------------------------------------------|
| Skull fracture                      | Unable to Assess | Unable to Assess  | Unable to Assess                                                                                                 | Unable to Assess                                                                                  |
| Epidural hemorrhage                 | Unable to Assess | Unable to Assess  | Unable to Assess                                                                                                 | Unable to Assess                                                                                  |
| Subdural hemorrhage                 | Unable to Assess | Unable to Assess  | Unable to Assess                                                                                                 | Unable to Assess                                                                                  |
| Subarachnoid hemorrhage             | Y                | Right             | Sylvian fissure                                                                                                  | Adjacent to small right fronto-temporal contusions                                                |
| Contusion                           | Y                | Bilateral         | Bifrontal, bitemporal                                                                                            | Left frontal and left temporal contusions larger than right frontal and right temporal contusions |
| Traumatic Axonal Injury             | Y                | bilateral         | Hemispheric white matter, as well as genu of the corpus callosum, bilateral midbrain tegmentum, and ventral pons | N/A                                                                                               |
| Edema                               | Y                | Left              | Pericontusional edema within the left frontal and left temporal contusions                                       | N/A                                                                                               |
| Ischemic or hypoxic-ischemic injury | N                | N/A               | N/A                                                                                                              | N/A                                                                                               |
| Brain atrophy or encephalomalacia   | N                | N/A               | N/A                                                                                                              | N/A                                                                                               |

**Supplemental Table 2: Traumatic Lesions Visualized on *Ex Vivo* MRI.**

All pathoanatomic lesions are characterized using the NIH Common Data Element (CDE) Guidelines for Traumatic Brain Injury Neuroimaging. N/A = not applicable.
