# Supplementary material
Source: PubMed Central journal article supplement (PMC8165468)
Supplement: Supp_TableS3.pdf [file Supp_TableS3.pdf]

| Variables                        | % Disrupted Tracts  |
|----------------------------------|---------------------|
| # APP swellings/ $\mu\text{m}^2$ | 9.5 [4.0, 14.9]     |
| <i>p-value</i>                   | <b>0.0009</b>       |
| NF-H % area                      | -11.4 [-17.0, -5.7] |
| <i>p-value</i>                   | <b>0.0002</b>       |
| GFAP % area                      | -1.9 [-7.4, 3.6]    |
| <i>p-value</i>                   | 0.4899              |
| IBA1 % area                      | 0.4 [-6.4, 7.2]     |
| <i>p-value</i>                   | 0.9016              |
| Heme % area                      | 4.8 [-0.9, 10.5]    |
| <i>p-value</i>                   | 0.0999              |
| LFB intensity                    | -2.9 [-9.5, 3.8]    |
| <i>p-value</i>                   | 0.3976              |

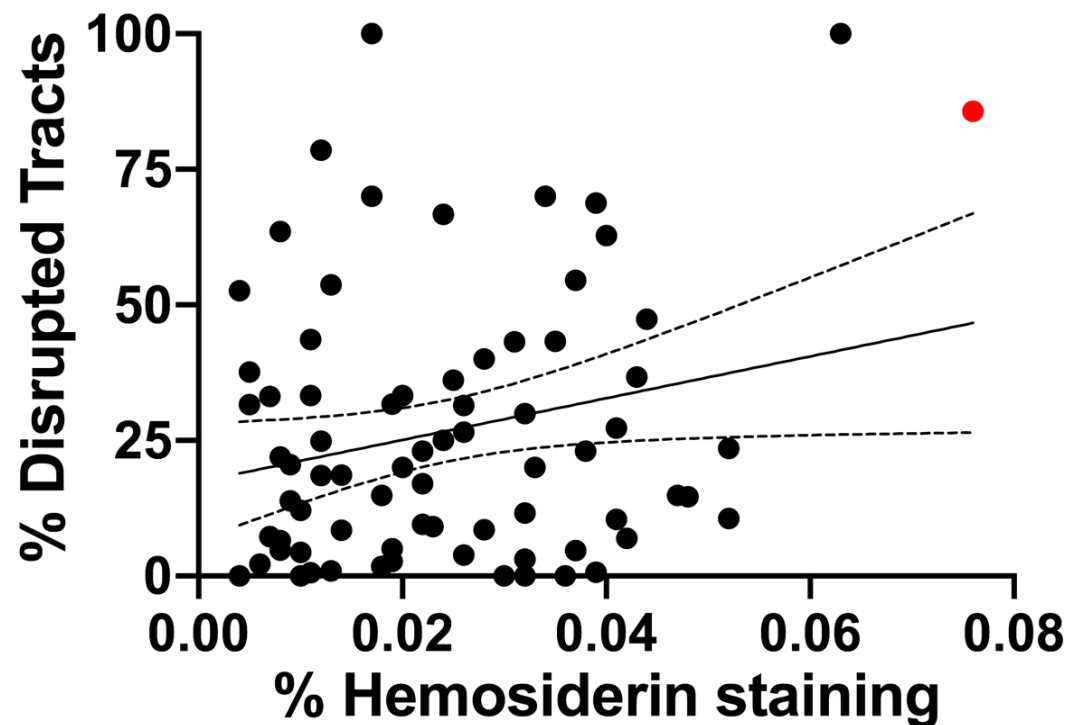

**Supplemental Table 3. Multiple Linear Regression Analysis without one of two ROIs driving Heme correlation indicated in red.** Degrees of freedom = 66. Coefficient [Confidence Interval]; APP = amyloid precursor protein, NF-H = neurofilament, GFAP = glial fibrillary acidic protein, IBA1 = ionized calcium binding adaptor molecule 1, Heme = hemosiderin, LFB = Luxol fast blue.
