# Supplementary material
Source: PubMed Central journal article supplement (PMC8165468)
Supplement: Supp_TableS4.pdf [file Supp_TableS4.pdf]

| Variables                        | % Disrupted Tracts  |
|----------------------------------|---------------------|
| # APP swellings/ $\mu\text{m}^2$ | 9.1 [3.7, 14.5]     |
| <i>p-value</i>                   | <b>0.0012</b>       |
| NF-H % area                      | -10.4 [-16.1, -4.8] |
| <i>p-value</i>                   | <b>0.0005</b>       |
| GFAP % area                      | -1.6 [-7.0, 3.7]    |
| <i>p-value</i>                   | 0.5435              |
| IBA1 % area                      | 1.4 [-5.6, 8.5]     |
| <i>p-value</i>                   | 0.6851              |
| Heme % area                      | 4.2 [-1.0, 9.5]     |
| <i>p-value</i>                   | 0.1031              |
| LFB intensity                    | -3.3 [-9.9, 3.4]    |
| <i>p-value</i>                   | 0.3282              |

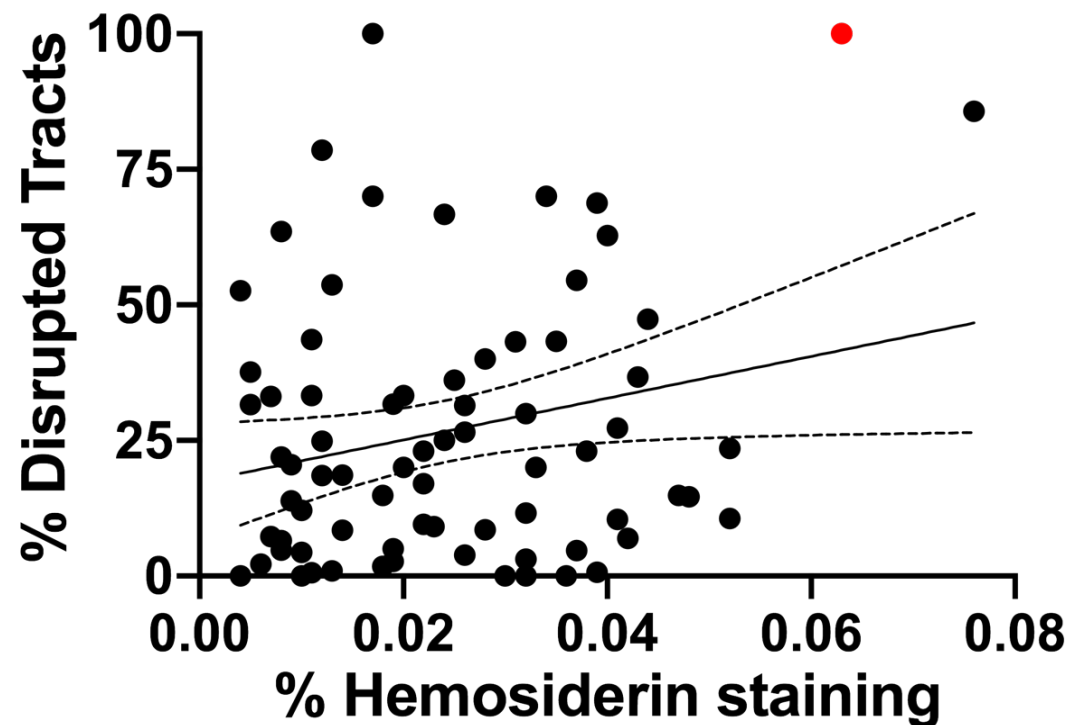

**Supplemental Table 4. Multiple Linear Regression Analysis without one of two ROIs driving Heme correlation indicated in red.** Degrees of freedom = 66. Coefficient [Confidence Interval]; APP = amyloid precursor protein, NF-H = neurofilament, GFAP = glial fibrillary acidic protein, IBA1 = ionized calcium binding adaptor molecule 1, Heme = hemosiderin, LFB =Luxol fast blue.
